# Supplementary material for: Application of Magnesium and Calcium Sulfate on Growth and Physiology of Forage Crops under Long-Term Salinity Stress
Source: MDPI journal article supplement (doi:10.3390/plants11243576), 2022-12-18
Supplement: s1 [file s1]

**Table S1.** Ion concentrations (g/kg) in stem, root, and leaf of *T. pratense*, *F. arundinacea* under six treatments at 60 DAT and 120 DAT.

| Species               | Date       | Treatments | Na                 |                     |                    | Ca                  |                    |                    | K                   |                     |                     | Mg                 |                     |                    | P                  |                     |                      |
|-----------------------|------------|------------|--------------------|---------------------|--------------------|---------------------|--------------------|--------------------|---------------------|---------------------|---------------------|--------------------|---------------------|--------------------|--------------------|---------------------|----------------------|
|                       |            |            | Stem               | Root                | Leaf               | Stem                | Root               | Leaf               | Stem                | Root                | Leaf                | Stem               | Root                | Leaf               | Stem               | Root                | Leaf                 |
| <i>T. pratense</i>    | 60<br>DAT  | CON        | 2.07 <sup>d</sup>  | 1.93 <sup>d</sup>   | 0.86 <sup>d</sup>  | 17.55 <sup>bc</sup> | 5.39 <sup>c</sup>  | 10.37 <sup>c</sup> | 22.41 <sup>bc</sup> | 11.38 <sup>bc</sup> | 19.26 <sup>c</sup>  | 4.36 <sup>ab</sup> | 3.81 <sup>a</sup>   | 3.12 <sup>c</sup>  | 7.28 <sup>d</sup>  | 11.45 <sup>d</sup>  | 24.54 <sup>a</sup>   |
|                       |            | NaCl       | 4.38 <sup>a</sup>  | 3.61 <sup>c</sup>   | 1.74 <sup>c</sup>  | 19.40 <sup>a</sup>  | 4.30 <sup>d</sup>  | 17.34 <sup>a</sup> | 23.35 <sup>b</sup>  | 12.83 <sup>a</sup>  | 21.31 <sup>b</sup>  | 4.62 <sup>ab</sup> | 1.95 <sup>b</sup>   | 5.59 <sup>a</sup>  | 7.69 <sup>d</sup>  | 15.71 <sup>a</sup>  | 16.76 <sup>b</sup>   |
|                       |            | 1 MS       | 2.58 <sup>c</sup>  | 5.09 <sup>b</sup>   | 2.64 <sup>b</sup>  | 18.67 <sup>ab</sup> | 6.55 <sup>b</sup>  | 14.73 <sup>b</sup> | 22.44 <sup>bc</sup> | 11.58 <sup>ab</sup> | 22.96 <sup>a</sup>  | 4.43 <sup>ab</sup> | 3.87 <sup>a</sup>   | 4.15 <sup>b</sup>  | 7.65 <sup>d</sup>  | 13.75 <sup>b</sup>  | 14.88 <sup>d</sup>   |
|                       |            | 2 MS       | 2.13 <sup>d</sup>  | 4.88 <sup>b</sup>   | 2.09 <sup>c</sup>  | 16.27 <sup>c</sup>  | 6.55 <sup>b</sup>  | 16.46 <sup>a</sup> | 26.71 <sup>a</sup>  | 10.04 <sup>cd</sup> | 19.79 <sup>c</sup>  | 4.70 <sup>a</sup>  | 3.85 <sup>a</sup>   | 4.18 <sup>b</sup>  | 11.79 <sup>a</sup> | 11.91 <sup>cd</sup> | 16.16 <sup>bc</sup>  |
|                       |            | 7.5 CS     | 2.79 <sup>c</sup>  | 3.34 <sup>c</sup>   | 1.81 <sup>c</sup>  | 18.19 <sup>ab</sup> | 7.95 <sup>a</sup>  | 16.91 <sup>a</sup> | 21.85 <sup>c</sup>  | 11.19 <sup>bc</sup> | 21.62 <sup>b</sup>  | 4.16 <sup>ab</sup> | 3.76 <sup>a</sup>   | 4.15 <sup>b</sup>  | 9.36 <sup>b</sup>  | 11.69 <sup>cd</sup> | 13.48 <sup>e</sup>   |
|                       |            | 10 CS      | 3.44 <sup>b</sup>  | 7.91 <sup>a</sup>   | 3.14 <sup>a</sup>  | 18.29 <sup>ab</sup> | 4.42 <sup>d</sup>  | 17.56 <sup>a</sup> | 21.48 <sup>c</sup>  | 9.44 <sup>d</sup>   | 22.04 <sup>ab</sup> | 4.04 <sup>b</sup>  | 1.65 <sup>b</sup>   | 4.52 <sup>b</sup>  | 8.41 <sup>c</sup>  | 12.72 <sup>bc</sup> | 15.89 <sup>c</sup>   |
|                       | 120<br>DAT | CON        | 1.18 <sup>c</sup>  | 3.57 <sup>d</sup>   | 1.32 <sup>c</sup>  | 10.11 <sup>b</sup>  | 9.37 <sup>c</sup>  | 16.89 <sup>d</sup> | 17.50 <sup>d</sup>  | 9.42 <sup>b</sup>   | 13.33 <sup>c</sup>  | 2.97 <sup>b</sup>  | 3.47 <sup>a</sup>   | 3.62 <sup>c</sup>  | 6.17 <sup>d</sup>  | 8.70 <sup>d</sup>   | 11.58 <sup>d</sup>   |
|                       |            | NaCl       | 9.93 <sup>a</sup>  | 13.21 <sup>a</sup>  | 3.57 <sup>a</sup>  | 10.08 <sup>b</sup>  | 7.32 <sup>e</sup>  | 18.47 <sup>c</sup> | 24.49 <sup>c</sup>  | 9.40 <sup>b</sup>   | 14.46 <sup>a</sup>  | 2.80 <sup>b</sup>  | 2.58 <sup>bc</sup>  | 4.01 <sup>b</sup>  | 7.76 <sup>c</sup>  | 13.26 <sup>bc</sup> | 13.30 <sup>b</sup>   |
|                       |            | 1 MS       | 5.82 <sup>b</sup>  | 8.99 <sup>c</sup>   | 2.92 <sup>b</sup>  | 10.58 <sup>b</sup>  | 6.31 <sup>f</sup>  | 22.97 <sup>b</sup> | 26.41 <sup>b</sup>  | 10.36 <sup>ab</sup> | 13.56 <sup>bc</sup> | 2.74 <sup>b</sup>  | 2.25 <sup>c</sup>   | 4.53 <sup>a</sup>  | 7.93 <sup>bc</sup> | 14.10 <sup>b</sup>  | 11.98 <sup>cd</sup>  |
|                       |            | 2 MS       | 5.38 <sup>b</sup>  | 10.36 <sup>bc</sup> | 2.89 <sup>b</sup>  | 10.29 <sup>b</sup>  | 8.43 <sup>d</sup>  | 19.59 <sup>c</sup> | 30.72 <sup>a</sup>  | 10.54 <sup>ab</sup> | 14.08 <sup>ab</sup> | 3.01 <sup>b</sup>  | 2.97 <sup>b</sup>   | 3.93 <sup>bc</sup> | 8.87 <sup>a</sup>  | 16.02 <sup>a</sup>  | 12.56 <sup>bcd</sup> |
|                       |            | 7.5 CS     | 5.33 <sup>b</sup>  | 12.81 <sup>a</sup>  | 3.09 <sup>b</sup>  | 11.44 <sup>b</sup>  | 11.48 <sup>b</sup> | 22.49 <sup>b</sup> | 27.58 <sup>b</sup>  | 11.32 <sup>a</sup>  | 14.53 <sup>a</sup>  | 2.96 <sup>b</sup>  | 2.91 <sup>b</sup>   | 4.11 <sup>b</sup>  | 8.43 <sup>ab</sup> | 15.47 <sup>a</sup>  | 14.35 <sup>a</sup>   |
|                       |            | 10 CS      | 5.52 <sup>b</sup>  | 10.82 <sup>b</sup>  | 2.89 <sup>b</sup>  | 13.96 <sup>a</sup>  | 12.45 <sup>a</sup> | 25.44 <sup>a</sup> | 26.27 <sup>b</sup>  | 9.78 <sup>b</sup>   | 11.86 <sup>d</sup>  | 3.59 <sup>a</sup>  | 3.39 <sup>a</sup>   | 4.14 <sup>b</sup>  | 8.42 <sup>ab</sup> | 12.67 <sup>c</sup>  | 12.92 <sup>bcd</sup> |
| <i>F. arundinacea</i> | 60<br>DAT  | CON        | 1.26 <sup>e</sup>  | 0.32 <sup>c</sup>   | 1.38 <sup>d</sup>  | 3.06 <sup>bcd</sup> | 2.35 <sup>b</sup>  | 4.15 <sup>bc</sup> | 18.18 <sup>a</sup>  | 1.54 <sup>bc</sup>  | 15.87 <sup>a</sup>  | 2.71 <sup>a</sup>  | 1.40 <sup>ab</sup>  | 2.53 <sup>b</sup>  | 1.86 <sup>a</sup>  | 0.29 <sup>a</sup>   | 1.07 <sup>b</sup>    |
|                       |            | NaCl       | 6.37 <sup>bc</sup> | 1.23 <sup>a</sup>   | 1.79 <sup>d</sup>  | 3.65 <sup>a</sup>   | 2.21 <sup>b</sup>  | 2.06 <sup>d</sup>  | 12.26 <sup>c</sup>  | 2.01 <sup>a</sup>   | 5.56 <sup>c</sup>   | 2.58 <sup>ab</sup> | 1.66 <sup>a</sup>   | 0.94 <sup>c</sup>  | 1.37 <sup>b</sup>  | 0.37 <sup>a</sup>   | 0.48 <sup>c</sup>    |
|                       |            | 1 MS       | 7.17 <sup>a</sup>  | 1.36 <sup>a</sup>   | 9.58 <sup>b</sup>  | 2.69 <sup>d</sup>   | 2.02 <sup>b</sup>  | 4.60 <sup>ab</sup> | 14.05 <sup>b</sup>  | 1.74 <sup>b</sup>   | 12.64 <sup>b</sup>  | 2.44 <sup>ab</sup> | 1.54 <sup>a</sup>   | 3.25 <sup>a</sup>  | 1.11 <sup>bc</sup> | 0.32 <sup>a</sup>   | 1.03 <sup>b</sup>    |
|                       |            | 2 MS       | 3.95 <sup>d</sup>  | 0.47 <sup>bc</sup>  | 7.97 <sup>c</sup>  | 2.80 <sup>cd</sup>  | 3.05 <sup>a</sup>  | 3.63 <sup>c</sup>  | 10.76 <sup>d</sup>  | 1.66 <sup>b</sup>   | 13.24 <sup>b</sup>  | 2.57 <sup>ab</sup> | 1.32 <sup>cab</sup> | 2.99 <sup>ab</sup> | 0.98 <sup>c</sup>  | 0.34 <sup>a</sup>   | 0.95 <sup>b</sup>    |
|                       |            | 7.5 CS     | 5.88 <sup>c</sup>  | 1.00 <sup>ab</sup>  | 7.48 <sup>c</sup>  | 3.56 <sup>ab</sup>  | 2.61 <sup>ab</sup> | 5.13 <sup>a</sup>  | 12.26 <sup>c</sup>  | 1.31 <sup>cd</sup>  | 12.56 <sup>b</sup>  | 2.59 <sup>ab</sup> | 1.14 <sup>bc</sup>  | 2.68 <sup>b</sup>  | 1.17 <sup>bc</sup> | 0.21 <sup>a</sup>   | 0.90 <sup>b</sup>    |
|                       |            | 10 CS      | 6.72 <sup>ab</sup> | 1.00 <sup>ab</sup>  | 11.74 <sup>a</sup> | 3.36 <sup>abc</sup> | 2.61 <sup>ab</sup> | 4.24 <sup>bc</sup> | 12.36 <sup>c</sup>  | 1.18 <sup>d</sup>   | 16.51 <sup>a</sup>  | 1.91 <sup>b</sup>  | 1.02 <sup>c</sup>   | 2.51 <sup>b</sup>  | 1.46 <sup>b</sup>  | 0.20 <sup>a</sup>   | 1.51 <sup>a</sup>    |
|                       | 120<br>DAT | CON        | 0.92 <sup>d</sup>  | 0.22 <sup>c</sup>   | 1.28 <sup>d</sup>  | 2.72 <sup>d</sup>   | 1.43 <sup>a</sup>  | 4.29 <sup>ab</sup> | 11.67 <sup>ab</sup> | 1.79 <sup>bc</sup>  | 19.95 <sup>a</sup>  | 2.07 <sup>c</sup>  | 1.77 <sup>bc</sup>  | 3.32 <sup>b</sup>  | 1.12 <sup>b</sup>  | 0.37 <sup>a</sup>   | 1.64 <sup>a</sup>    |
|                       |            | NaCl       | 8.01 <sup>b</sup>  | 0.52 <sup>bc</sup>  | 4.92 <sup>c</sup>  | 3.17 <sup>c</sup>   | 1.37 <sup>a</sup>  | 2.54 <sup>d</sup>  | 10.51 <sup>bc</sup> | 2.26 <sup>a</sup>   | 9.74 <sup>e</sup>   | 2.50 <sup>b</sup>  | 1.99 <sup>ab</sup>  | 1.90 <sup>d</sup>  | 0.99 <sup>bc</sup> | 0.38 <sup>a</sup>   | 0.75 <sup>c</sup>    |
|                       |            | 1 MS       | 1.11 <sup>d</sup>  | 0.26 <sup>c</sup>   | 1.44 <sup>d</sup>  | 3.14 <sup>c</sup>   | 1.89 <sup>a</sup>  | 4.25 <sup>ab</sup> | 9.18 <sup>c</sup>   | 2.15 <sup>ab</sup>  | 15.44 <sup>d</sup>  | 2.99 <sup>a</sup>  | 2.26 <sup>a</sup>   | 3.78 <sup>a</sup>  | 0.75 <sup>bc</sup> | 0.35 <sup>a</sup>   | 1.04 <sup>bc</sup>   |
|                       |            | 2 MS       | 6.97 <sup>c</sup>  | 0.99 <sup>a</sup>   | 7.30 <sup>b</sup>  | 2.61 <sup>d</sup>   | 1.50 <sup>a</sup>  | 3.12 <sup>c</sup>  | 10.55 <sup>bc</sup> | 1.91 <sup>ab</sup>  | 16.77 <sup>c</sup>  | 2.48 <sup>b</sup>  | 1.37 <sup>cd</sup>  | 2.78 <sup>c</sup>  | 1.00 <sup>b</sup>  | 0.28 <sup>a</sup>   | 1.16 <sup>b</sup>    |
|                       |            | 7.5 CS     | 6.55 <sup>c</sup>  | 0.62 <sup>b</sup>   | 7.61 <sup>b</sup>  | 3.58 <sup>b</sup>   | 1.59 <sup>a</sup>  | 4.40 <sup>a</sup>  | 9.26 <sup>c</sup>   | 1.38 <sup>c</sup>   | 17.84 <sup>b</sup>  | 1.98 <sup>c</sup>  | 1.33 <sup>cd</sup>  | 2.26 <sup>d</sup>  | 0.64 <sup>c</sup>  | 0.21 <sup>a</sup>   | 0.99 <sup>bc</sup>   |
|                       |            | 10 CS      | 8.86 <sup>a</sup>  | 0.77 <sup>ab</sup>  | 8.11 <sup>a</sup>  | 4.50 <sup>a</sup>   | 1.30 <sup>a</sup>  | 3.99 <sup>b</sup>  | 12.14 <sup>a</sup>  | 1.47 <sup>c</sup>   | 19.66 <sup>a</sup>  | 1.68 <sup>c</sup>  | 1.27 <sup>d</sup>   | 2.08 <sup>d</sup>  | 1.55 <sup>a</sup>  | 0.25 <sup>a</sup>   | 1.73 <sup>a</sup>    |
